# Supplementary material for: Clinical treatment of patients with scrub typhus-induced liver injury and intracranial infection
Source: PubMed Central journal article supplement — J Int Med Res. 2023 Nov 26;51(11):03000605231214503. doi: 10.1177/03000605231214503 (PMC10683569; doi:10.1177/03000605231214503), 2023-11-26
Supplement: sj-pdf-2-imr-10.1177_03000605231214503.pdf [file sj-pdf-2-imr-10.1177_03000605231214503.pdf]

# Approval of Zhongshan City People's Hospital clinical research and animal experiment Ethic Committee

Date of Application 申请日期: 2023/08/14

|                              |                                                                                                                                                                                                                                                                                                                                                                                                                                                                                                                                                                                      |
|------------------------------|--------------------------------------------------------------------------------------------------------------------------------------------------------------------------------------------------------------------------------------------------------------------------------------------------------------------------------------------------------------------------------------------------------------------------------------------------------------------------------------------------------------------------------------------------------------------------------------|
| The Project<br>项目名称          | Treatment of patients with scrub worm disease-induced liver injury and intracranial infection<br>恙虫病肝损伤合并颅内感染患者的治疗                                                                                                                                                                                                                                                                                                                                                                                                                                                                   |
| Major Investigators<br>主要研究者 | HongKui Sun1,Li Lei1,JianWei Li1,Haiming Niu1,Jiezhang Yang1,MiaoLian Chen1*<br>孙红奎, 雷俐, 李建伟, 牛海名, 杨杰章, 陈妙莲                                                                                                                                                                                                                                                                                                                                                                                                                                                                          |
| Department<br>专业&科室          | Critical care department<br>重症医学科                                                                                                                                                                                                                                                                                                                                                                                                                                                                                                                                                    |
| Classification<br>研究分类       | 1 病理标本实验 Pathology specimens research ( )<br>2 人体实验 Human research ( )<br>3 人体组织或细胞实验 Human tissue or cell experiments ( )<br>4 其他研究 Other research ( <input checked="" type="checkbox"/> )                                                                                                                                                                                                                                                                                                                                                                                          |
| Conclusion<br>审查意见           | <p><input checked="" type="checkbox"/> 同意 Approved</p> <p><input type="checkbox"/> 修正后同意 Agree after revision (Specify modification below or in accompany letter) _____</p> <p><input type="checkbox"/> 不同意 Disagree (Specify reasons below or in accompany letter) _____</p>                                                                                                                                                                                                                                                                                                        |
| Statement<br>审查声明            | <p>兹证明本研究的设计和方法符合相关法规和伦理原则的要求。伦理委员会批准本研究项目在本院执行。</p> <p>This is to certify that the design and methods of the research are in accordance with the requirements of related regulations and procedures as well as the ethical principles. The IEC has approved the research to be conducted.</p> <div style="text-align: center;">  <p>中山市人民医院临床科研和实验动物伦理委员会<br/>Zhongshan City People's Hospital<br/>clinical research and animal experiment Ethic Committee</p> <p>手写日期 2023.8.14 盖章</p> </div> |
