# Supplementary material for: Clinical treatment of patients with scrub typhus-induced liver injury and intracranial infection
Source: PubMed Central journal article supplement — J Int Med Res. 2023 Nov 26;51(11):03000605231214503. doi: 10.1177/03000605231214503 (PMC10683569; doi:10.1177/03000605231214503), 2023-11-26
Supplement: sj-pdf-3-imr-10.1177_03000605231214503.pdf [file sj-pdf-3-imr-10.1177_03000605231214503.pdf]

# 允许发表书

所发表材料的简介，包括病史内容或者图片：

根据文章发表需要，在隐去您的个人信息和遮挡身体敏感部分后，您的病史资料、检查结果、影像学图片、患病部位照片等资料可能会出现在发表的文章中。

贡献度：

您的上述病史资料对于疾病的研究至关重要，可以为疾病的病因研究、治疗和预防研究提供重要资料。

本部分由患者完成：

我同意我的病史或者病历材料的全部或者部分发表在任何国内或国际期刊中，我理解这些病史材料可能会被用来描述本人病情。

不适用：我的真实名字出现在所发的文章期刊中将不适用。

我理解：

- 文章作者和杂志社也会尽力保护我的隐私权，使患者的病史资料处于匿名状态，我了解可能会有人依据文章中的图片或者资料辨认出我。
- 本人的病史材料可以被匿名发表在打印版或者电子版的国际刊物，网站，未经许可或者重印的杂志刊物（包括国外的刊物）和其它衍生物的作品或者产品。
- 我同意授予作者或杂志社使用本人病史材料的所有权或者相关的利益，本人不会接受并放弃所求任何因使用病史材料而产生的权益或者使用费用。
- 我的病史可能会被编辑、修改和润色。

签名： 杨行生 日期： 2023.6.25

地址： 中山大学同德学院一卷

如果您不是患者本人，请说明您和患者的关系： 父子

日期： 2023.6.25
